# Supplementary material for: Ultrasonographic Algorithm for the Assessment of Sentinel Lymph Nodes That Drain the Mammary Carcinomas in Female Dogs
Source: PubMed Central journal article supplement (PMC7763578; doi:10.3390/ani10122366), 2020-12-10
Supplement: animals-10-02366-s001.pdf [file animals-10-02366-s001.pdf]

Supplementary file 1

| Demographic characteristics, histological diagnosis of mammary tumor and lymphatic drainage of involved tumoral mammary gland |                    |      |                                         |                |                                    |                  |   |                      |       |       |         |                                       |            |           |
|-------------------------------------------------------------------------------------------------------------------------------|--------------------|------|-----------------------------------------|----------------|------------------------------------|------------------|---|----------------------|-------|-------|---------|---------------------------------------|------------|-----------|
| No.                                                                                                                           | Breed              | Age  | Histological diagnosis of mammary tumor | Tumor location |                                    |                  |   | Sentinel lymph nodes |       |       |         | Histological diagnosis of lymph nodes |            |           |
|                                                                                                                               |                    |      |                                         | T <sub>1</sub> | A <sub>1</sub><br>A <sub>2</sub> I | A <sub>2</sub> I | I | Acc ax               | Pr ax | St cr | Ing sup | Benign                                | Metastatic |           |
| 1                                                                                                                             | German Shepherds   | 8,9  | CMT                                     | +              |                                    |                  |   |                      |       | +     | +       |                                       | +          |           |
| 2                                                                                                                             | Rottweiler         | 10,6 | CMT                                     | +              |                                    |                  |   |                      |       | +     |         |                                       |            | +         |
| 3                                                                                                                             | Yorkshire terriers | 11,3 | CMT                                     | +              |                                    |                  |   |                      | +     |       |         |                                       | +          |           |
| 4                                                                                                                             | Mixed breed        | 12,0 | CMT                                     |                | +                                  |                  |   |                      | +     |       |         | +                                     | +          | (Ing sup) |
| 5                                                                                                                             | Mixed breed        | 10,4 | CMT                                     |                | +                                  |                  |   |                      |       | +     |         | +                                     |            | ++        |
| 6                                                                                                                             | Cocker Spaniels    | 9,5  | CMT                                     |                | +                                  |                  |   |                      |       | +     |         | +                                     |            | ++        |
| 7                                                                                                                             | German Shepherds   | 8,9  | CMT                                     |                | +                                  |                  |   |                      |       |       |         | +                                     |            | +         |
| 8                                                                                                                             | Rottweiler         | 9,6  | CMT                                     |                | +                                  |                  |   |                      |       |       |         | +                                     | +          |           |
| 9                                                                                                                             | Doberman Pinschers | 8,8  | CMT                                     |                | +                                  |                  |   |                      |       |       |         | +                                     |            | +         |
| 10                                                                                                                            | Mixed breed        | 10,5 | CMT                                     |                | +                                  |                  |   |                      |       |       |         | +                                     |            | +         |
| 11                                                                                                                            | Yorkshire terriers | 12,1 | CMT                                     |                | +                                  |                  |   |                      |       |       |         | +                                     |            | +         |
| 12                                                                                                                            | German Shepherds   | 8,7  | CMT                                     |                | +                                  |                  |   |                      |       |       |         | +                                     | +          |           |
| 13                                                                                                                            | Doberman Pinschers | 9,8  | CMT                                     |                | +                                  |                  |   |                      |       |       |         | +                                     | +          |           |
| 14                                                                                                                            | Mixed breed        | 10,9 | CMT                                     |                | +                                  |                  |   |                      |       |       |         | +                                     | +          |           |
| 15                                                                                                                            | Mixed breed        | 11,6 | CMT                                     |                |                                    | +                |   |                      |       |       |         | +                                     |            | +         |
| 16                                                                                                                            | Dachshund          | 14,1 | CMT                                     |                |                                    | +                |   |                      |       |       |         | +                                     |            | +         |
| 17                                                                                                                            | Mixed breed        | 12,4 | CMT                                     |                |                                    | +                |   |                      |       |       |         | +                                     | +          |           |
| 18                                                                                                                            | German Shepherds   | 9,8  | CMT                                     |                |                                    | +                |   |                      |       |       |         | +                                     |            | +         |
| 19                                                                                                                            | Doberman Pinschers | 8,9  | CMT                                     |                |                                    |                  | + |                      |       |       |         | ++                                    | ++         |           |
| 20                                                                                                                            | Doberman Pinschers | 8,0  | CMT                                     |                |                                    |                  | + |                      |       |       |         | ++                                    | ++         |           |
| 21                                                                                                                            | Cocker Spaniels    | 11,5 | CMT                                     |                |                                    |                  | + |                      |       |       |         | ++                                    |            | ++        |
| 22                                                                                                                            | Mixed breed        | 11,2 | CMT                                     |                |                                    |                  | + |                      |       |       |         | +                                     | +          |           |
| 23                                                                                                                            | Doberman Pinschers | 10,9 | CMT                                     |                |                                    |                  | + |                      |       |       |         | +                                     |            | +         |
| 24                                                                                                                            | Mixed breed        | 13,6 | CMT                                     |                |                                    |                  | + |                      |       |       |         | +                                     |            | +         |
| 25                                                                                                                            | Mixed breed        | 12,5 | CMT                                     |                |                                    |                  | + |                      |       |       |         | +                                     |            | +         |
| 26                                                                                                                            | Doberman Pinschers | 9,1  | CS-T                                    |                |                                    | +                |   |                      |       |       |         | +                                     | +          |           |
| 27                                                                                                                            | German Shepherds   | 8,1  | CS-T                                    |                |                                    | +                |   |                      |       |       |         | ++                                    | ++         |           |
| 28                                                                                                                            | Mixed breed        | 8,6  | CS-T                                    |                |                                    | +                |   |                      |       |       |         | +                                     |            | +         |
| 29                                                                                                                            | Mixed breed        | 8,9  | CS-T                                    |                |                                    | +                |   |                      |       |       |         | ++                                    | ++         |           |
| 30                                                                                                                            | Mixed breed        | 9,7  | CS-T                                    |                |                                    | +                |   |                      |       |       |         | +                                     |            | +         |
| 31                                                                                                                            | German Shepherds   | 11,2 | CS-T                                    |                |                                    | +                |   |                      |       |       |         | +                                     | +          |           |
| 32                                                                                                                            | Mixed breed        | 8,5  | CS-T                                    |                |                                    | +                |   |                      |       |       |         | +                                     | +          |           |
| 33                                                                                                                            | Cocker Spaniels    | 10,0 | CS-T                                    |                |                                    | +                |   |                      |       |       |         | +                                     |            | +         |
| 34                                                                                                                            | Doberman Pinschers | 9,3  | CS-T                                    |                |                                    | +                |   |                      |       |       |         | +                                     | +          |           |
| 35                                                                                                                            | German Shepherds   | 9,1  | CS-T                                    |                |                                    | +                |   |                      |       |       |         | +                                     |            | +         |
| 36                                                                                                                            | Mixed breed        | 9,8  | CS-T                                    |                |                                    |                  | + |                      |       |       |         | ++                                    |            |           |
| 37                                                                                                                            | Mixed breed        | 11,2 | CS-T                                    |                |                                    |                  | + |                      |       |       |         | +                                     | +          |           |
| 38                                                                                                                            | Doberman Pinschers | 9,7  | CS-T                                    |                |                                    |                  | + |                      |       |       |         | ++                                    |            | ++        |
| 39                                                                                                                            | Cocker Spaniels    | 11,2 | CS-T                                    |                |                                    |                  | + |                      |       |       |         | +                                     |            | +         |
| 40                                                                                                                            | Dachshund          | 14,1 | CS-T                                    |                |                                    |                  | + |                      |       |       |         | +                                     | +          |           |
| 41                                                                                                                            | Mixed breed        | 10,1 | CS-T                                    |                |                                    |                  | + |                      |       |       |         | +                                     |            | +         |
| 42                                                                                                                            | Mixed breed        | 9,5  | CS-T                                    |                |                                    |                  | + |                      |       |       |         | +                                     | +          |           |
| 43                                                                                                                            | Rottweiler         | 8,9  | CS-T                                    |                |                                    |                  | + |                      |       |       |         | +                                     |            | +         |
| 44                                                                                                                            | Mixed breed        | 11,6 | CS-T                                    |                |                                    |                  | + |                      |       |       |         | ++                                    | ++         |           |
| 45                                                                                                                            | Mixed breed        | 12,5 | CS-TP                                   | +              |                                    |                  |   |                      | +     |       |         |                                       |            | +         |
| 46                                                                                                                            | Mixed breed        | 13,6 | CS-TP                                   | +              |                                    |                  |   |                      |       | +     | +       |                                       | +          |           |
| 47                                                                                                                            | Yorkshire terriers | 12,5 | CS-TP                                   | +              |                                    |                  |   |                      |       | +     |         |                                       |            | +         |
| 48                                                                                                                            | Mixed breed        | 11,5 | CS-TP                                   | +              |                                    |                  |   |                      |       | +     |         |                                       | +          |           |
| 49                                                                                                                            | Mixed breed        | 9,7  | CS-TP                                   |                | +                                  |                  |   |                      | +     |       |         | +                                     |            | ++        |
| 50                                                                                                                            | Mixed breed        | 8,9  | CS-TP                                   |                | +                                  |                  |   |                      |       | +     |         | +                                     | ++         |           |
| 51                                                                                                                            | German Shepherds   | 8,0  | CS-TP                                   |                | +                                  |                  |   |                      |       | +     |         | +                                     |            | ++        |

|    |                    |      |              |                    |    |    |    |                           |                               |                                  |                         |                          |    |
|----|--------------------|------|--------------|--------------------|----|----|----|---------------------------|-------------------------------|----------------------------------|-------------------------|--------------------------|----|
| 52 | Rottweiler         | 9,0  | CS-TP        |                    | +  |    |    |                           | +                             |                                  | +                       |                          | ++ |
| 53 | Doberman Pinschers | 10,8 | CS-TP        |                    | +  |    |    |                           |                               |                                  | +                       | +                        |    |
| 54 | Mixed breed        | 11,7 | CS-TP        |                    |    |    | +  |                           |                               |                                  | ++                      |                          | ++ |
| 55 | Mixed breed        | 14,2 | CS-TP        |                    |    |    | +  |                           |                               |                                  | ++                      | ++                       |    |
| 56 | Yorkshire terriers | 11,9 | CS-TP        |                    |    |    | +  |                           |                               |                                  | ++                      | ++                       |    |
| 57 | Mixed breed        | 10,6 | CS-TP        |                    |    |    | +  |                           |                               |                                  | +                       |                          | +  |
| 58 | Rottweiler         | 9,2  | CS-P         |                    |    |    | +  |                           |                               |                                  | +                       | +                        |    |
| 59 | Mixed breed        | 9,1  | CS-TP        |                    |    |    | +  |                           |                               |                                  | +                       |                          | +  |
| 60 | Mixed breed        | 10,5 | CS-TP        |                    |    |    | +  |                           |                               |                                  | +                       |                          | +  |
| 61 | Mixed breed        | 8,9  | CS-TP        |                    |    |    | +  |                           |                               |                                  | +                       | +                        |    |
| 62 | Rottweiler         | 8,7  | CS           | +                  |    |    |    | +                         |                               |                                  |                         |                          | +  |
| 63 | Yorkshire terriers | 12,5 | CS           | +                  |    |    |    |                           | +                             |                                  |                         | +                        |    |
| 64 | Mixed breed        | 14,5 | CS           |                    | +  |    |    | +                         |                               |                                  | +                       |                          | ++ |
| 65 | Rottweiler         | 10,3 | CS           |                    |    |    | +  |                           |                               |                                  | ++                      | ++                       |    |
| 66 | Cocker Spaniels    | 11,7 | CS           |                    |    |    | +  |                           |                               |                                  | ++                      |                          | ++ |
| 67 | German Shepherds   | 8,9  | CC           |                    |    |    | +  |                           |                               |                                  | ++                      | ++                       |    |
| 68 | Mixed breed        | 12,0 | CC           |                    |    |    | +  |                           |                               |                                  | ++                      |                          | ++ |
| 69 | Dachshund          | 14,6 | CC           |                    |    |    | +  |                           |                               |                                  | +                       |                          | +  |
| 70 | Doberman Pinschers | 10,6 | CA           |                    |    |    | +  |                           |                               |                                  | ++                      |                          | ++ |
| 71 | German Shepherds   | 9,2  | CA           |                    |    |    | +  |                           |                               |                                  | ++                      |                          | ++ |
|    |                    |      | <b>Total</b> | 9                  | 17 | 14 | 31 | 6                         | 11                            | 2                                | 79                      |                          | ++ |
|    |                    |      | <b>TOTAL</b> | <b>71 subjects</b> |    |    |    | <b>17 axillary<br/>ln</b> | <b>2<br/>st<br/>ct<br/>ln</b> | <b>79<br/>sup<br/>ing<br/>ln</b> | <b>42 benign</b>        | <b>54<br/>metastatic</b> |    |
|    |                    |      |              |                    |    |    |    | <b>96 evaluated SLN</b>   |                               |                                  | <b>96 evaluated SLN</b> |                          |    |

**Legend:** Histological diagnosis of mammary tumor according to Goldschmidt *et al.*, 2011 [49]. CMT – carcinoma in a mixed tumor; CS-T – carcinoma simple tubular; C-TP – carcinoma simple tubulopapillary; CS – carcinoma solid; CC – carcinoma complex type; CA – carcinoma anaplastic. T<sub>1</sub> – cranial thoracic mammary gland; A<sub>1</sub> – cranial abdominal mammary gland; A<sub>2</sub> – caudal abdominal mammary gland; I – inguinal mammary gland; Pr ax – proper axillary lymph node; Acc ax – accessory axillary lymph node; St cr – cranial sternal lymph node; Ing sup – superficial inguinal lymph nodes.
